# Supplementary material
Source: Springer Nature journal article supplement (https://www.springermedizin.de/resource/supplementary/12889_2006_470_MOESM3_ESM.pdf/9500940)

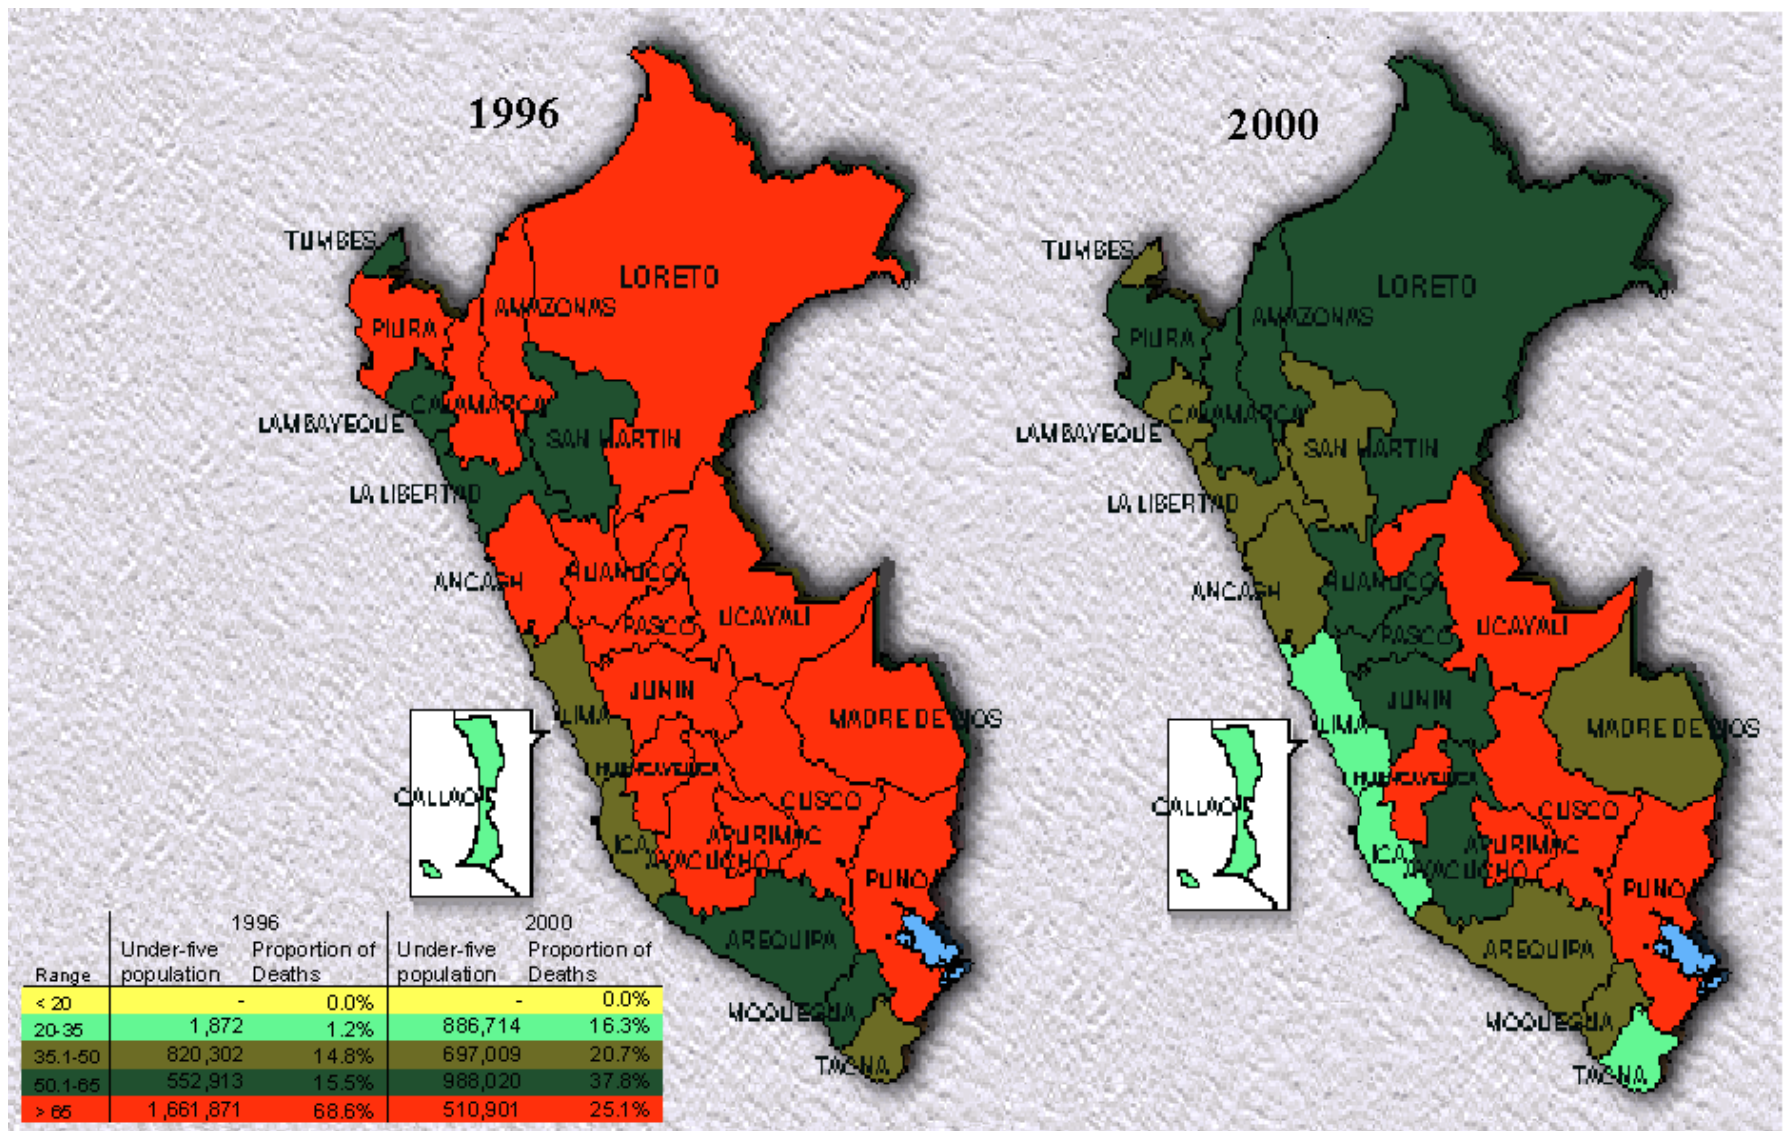

Supplement: MOESM3 [file 9500940]
